# Supplementary material for: Experimental phasing opportunities for macromolecular crystallography at very long wavelengths
Source: PubMed Central journal article supplement (PMC10570326; doi:10.1038/s42004-023-01014-0), 2023-10-12
Supplement: 42004_2023_1014_MOESM1_ESM.pdf [file 42004_2023_1014_MOESM1_ESM.pdf]

## Supplementary figures

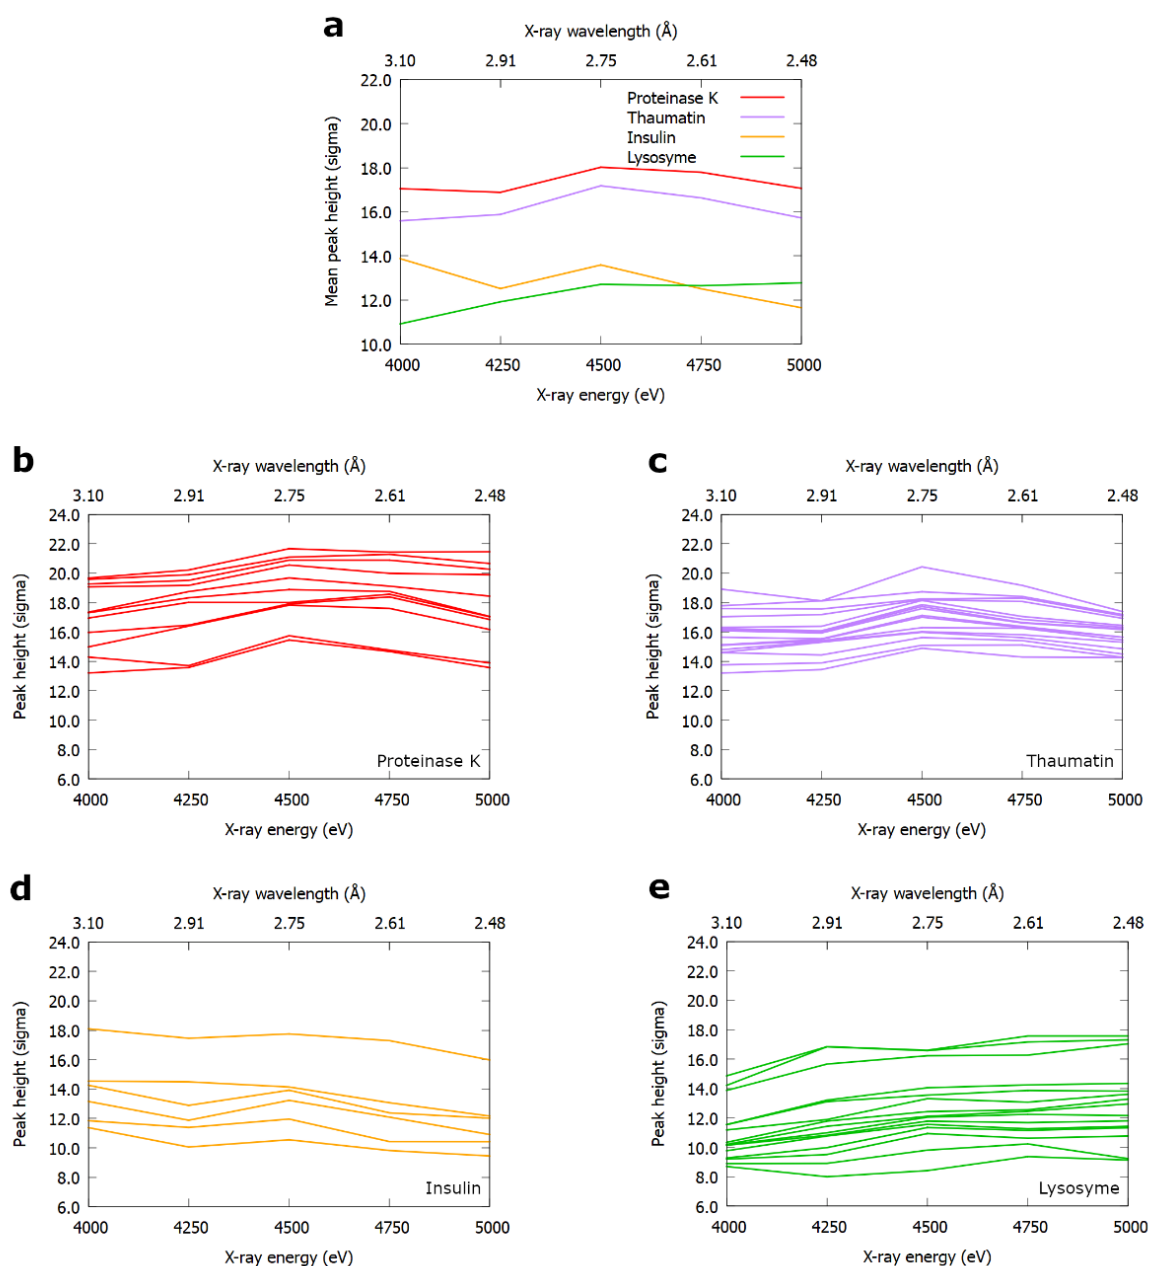

**Supplementary Figure 1: Variation of the anomalous mean peak height with X-ray wavelength (or energy) on the I23 beamline.** (a) Mean anomalous peak heights for all sulfur atoms and anomalous scatterers were calculated at 3.10, 2.98, 2.75 and 2.48 Å wavelengths for four test crystals. Individual anomalous peak heights are shown as a function of X-ray wavelength (or energy) for each test crystal: proteinase K in red (b), thaumatin in purple (c), insulin in yellow (d) and lysozyme in green (e).

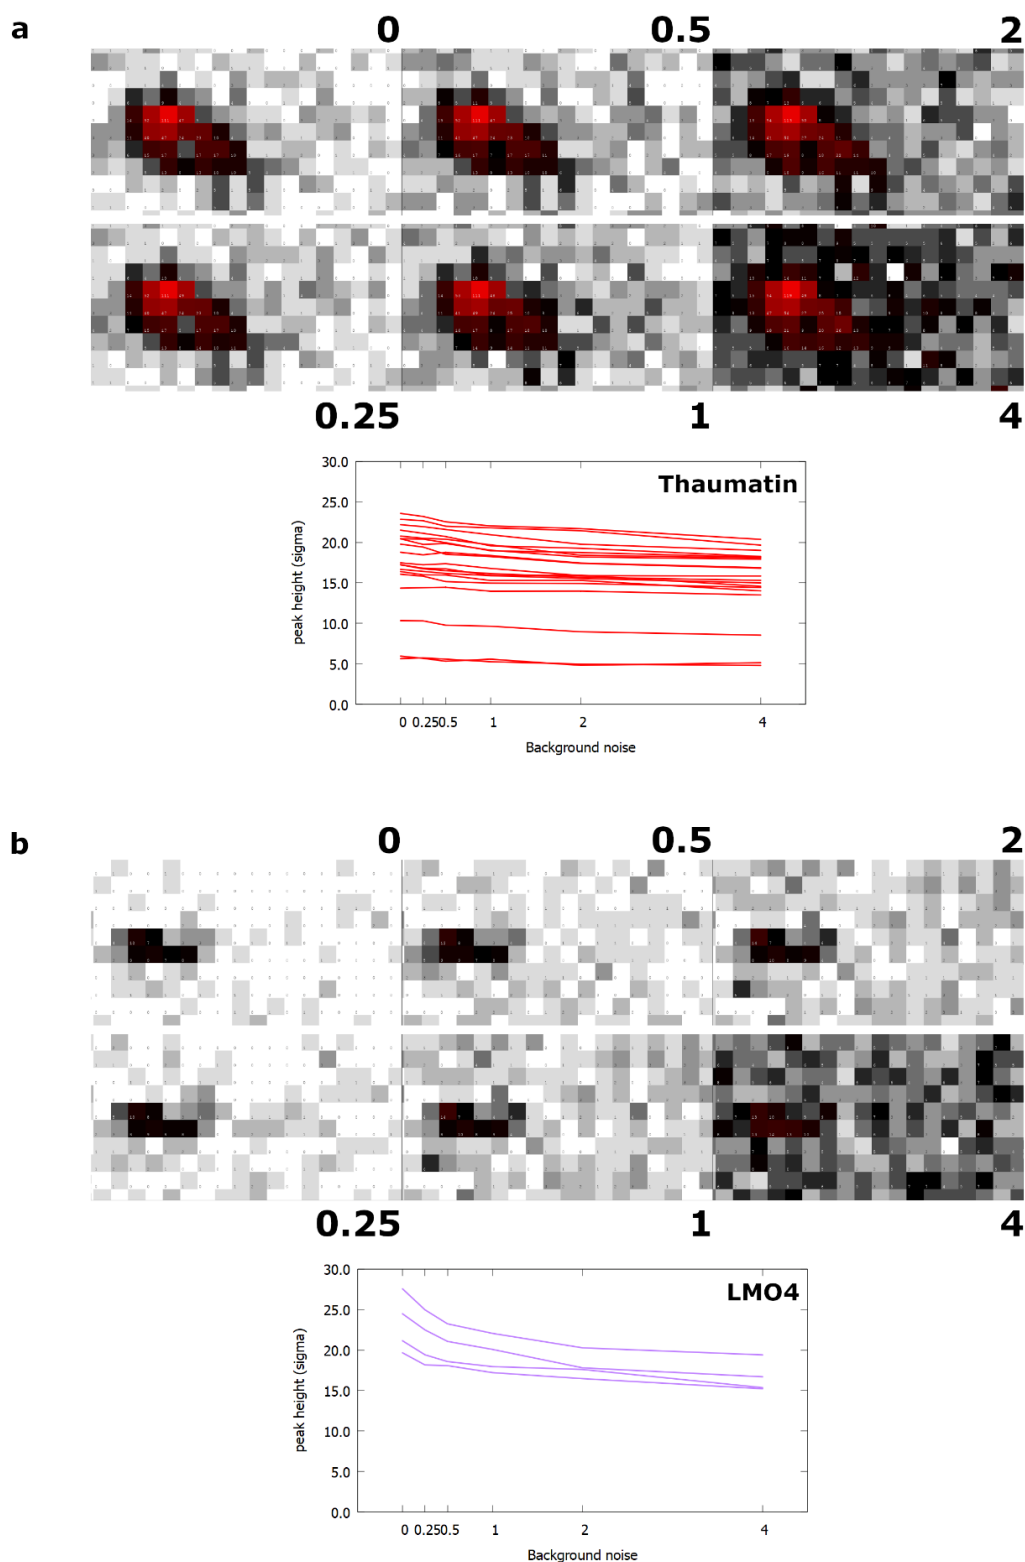

**Supplementary Figure 2: Effect of detector background noise on anomalous peak heights.** (a) Top- Example of different noise levels (0, 0.25, 0.5, 1, 2, 4) around a diffraction spot from a thaumatin crystal. Bottom- Sulfur peak heights measured from a thaumatin crystal with different detector background noise levels. Each line corresponds to one sulfur atoms. (b) Same as (a) but using a LMO4 crystal and measuring the peak heights of the four intrinsically bound zinc ions.

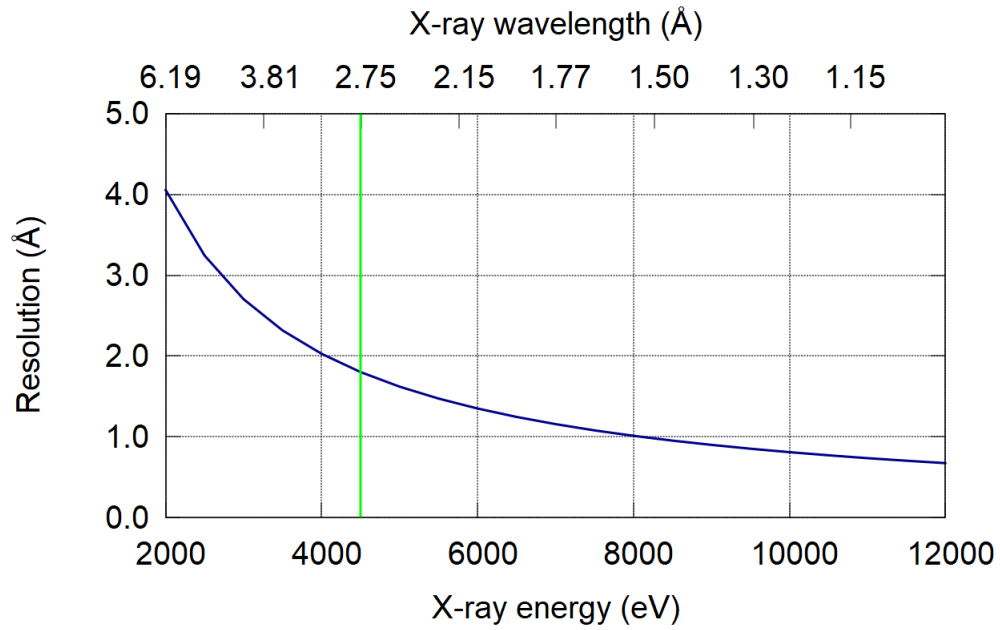

**Supplementary Figure 3: Variation of the maximum achievable resolution with X-ray wavelength (or energy) on the I23 Beamline.** The detector size of the Pilatus 12M (Dectris) is limiting the resolution at longer wavelengths. At the preferred wavelength of 2.75 Å for S-SAD experiments (vertical green bar), a maximum resolution of 1.8 Å can be recorded.

## Supplementary Tables:

|                                   | Proteinase K                   |                                |                                |                                |                                |
|-----------------------------------|--------------------------------|--------------------------------|--------------------------------|--------------------------------|--------------------------------|
| Energy (keV)                      | 4                              | 4.25                           | 4.5                            | 4.75                           | 5                              |
| Wavelength (Å)                    | 3.099                          | 2.917                          | 2.755                          | 2.610                          | 2.479                          |
| Resolution range (Å)              | 48.17 - 1.99<br>(2.06 - 1.99)  | 48.17 - 1.87<br>(1.94 - 1.87)  | 48.17 - 1.79<br>(1.86 - 1.79)  | 48.17 - 1.79<br>(1.86 - 1.79)  | 48.17 - 1.79<br>(1.86 - 1.79)  |
| Space group                       | $P 4_3 2_1 2$                  |                                |                                |                                |                                |
| Unit cell dimensions (Å,°)        | 68.12 68.12<br>102.08 90 90 90 | 68.12 68.12<br>102.08 90 90 90 | 68.12 68.12<br>102.08 90 90 90 | 68.12 68.12<br>102.09 90 90 90 | 68.12 68.12<br>102.09 90 90 90 |
| Total reflections                 | 240938 (7867)                  | 277663 (9383)                  | 338553 (17069)                 | 364370 (26360)                 | 379025 (27520)                 |
| Unique reflections                | 28639 (2374)                   | 33334 (2837)                   | 39407 (3464)                   | 40058 (3678)                   | 40499 (3754)                   |
| Multiplicity                      | 8.4 (3.3)                      | 8.3 (3.3)                      | 8.6 (4.9)                      | 9.1 (7.2)                      | 9.4 (7.3)                      |
| Completeness (%)                  | 91.43 (75.56)                  | 88.66 (75.07)                  | 92.57 (81.99)                  | 94.03 (87.01)                  | 95.04 (88.71)                  |
| Mean I/sigma(I)                   | 18.88 (6.94)                   | 18.47 (5.67)                   | 19.81 (6.79)                   | 20.67 (7.93)                   | 20.55 (7.47)                   |
| Wilson B-factor (Å <sup>2</sup> ) | 20.09                          | 19.11                          | 17.81                          | 17.49                          | 17.12                          |
| R-merge                           | 0.0785 (0.1611)                | 0.0747 (0.1820)                | 0.0702 (0.1827)                | 0.0681 (0.1868)                | 0.0686 (0.2056)                |
| R-meas                            | 0.0829 (0.1914)                | 0.0788 (0.2156)                | 0.0739 (0.2044)                | 0.0717 (0.2015)                | 0.0722 (0.2213)                |
| R-pim                             | 0.0260 (0.1015)                | 0.0245 (0.1134)                | 0.0227 (0.0886)                | 0.0218 (0.0736)                | 0.0218 (0.0799)                |
| CC1/2                             | 0.997 (0.958)                  | 0.998 (0.944)                  | 0.998 (0.969)                  | 0.999 (0.979)                  | 0.999 (0.974)                  |

**Supplementary Table 1:** Data collection statistics for Proteinase K. Numbers in parentheses refer to the highest resolution data shell.

|                                   | Thaumatococcus                 |                                |                                |                                |                                |
|-----------------------------------|--------------------------------|--------------------------------|--------------------------------|--------------------------------|--------------------------------|
| Energy (keV)                      | 4                              | 4.25                           | 4.5                            | 4.75                           | 5                              |
| Wavelength (Å)                    | 3.099                          | 2.917                          | 2.755                          | 2.610                          | 2.479                          |
| Resolution range (Å)              | 54.05 - 1.99<br>(2.06 - 1.99)  | 54.05 - 1.87<br>(1.94 - 1.87)  | 54.06 - 1.79<br>(1.86 - 1.79)  | 54.06 - 1.79<br>(1.86 - 1.79)  | 54.06 - 1.79<br>(1.84 - 1.79)  |
| Space group                       | $P 4_1 2_1 2$                  |                                |                                |                                |                                |
| Unit cell dimensions (Å,°)        | 57.92 57.92<br>150.40 90 90 90 | 57.92 57.92<br>150.41 90 90 90 | 57.93 57.93<br>150.43 90 90 90 | 57.93 57.93<br>150.44 90 90 90 | 57.92 57.92<br>150.45 90 90 90 |
| Total reflections                 | 258403 (8136)                  | 305576 (9776)                  | 364889 (18678)                 | 392043 (28239)                 | 406610 (29742)                 |
| Unique reflections                | 28321 (2168)                   | 33725 (2665)                   | 39098 (3308)                   | 40046 (3557)                   | 40733 (3644)                   |
| Multiplicity                      | 9.1 (3.8)                      | 9.1 (3.7)                      | 9.3 (5.6)                      | 9.8 (7.9)                      | 10.0 (8.2)                     |
| Completeness (%)                  | 84.85 (65.14)                  | 84.14 (66.24)                  | 86.15 (72.78)                  | 88.20 (78.42)                  | 89.73 (80.34)                  |
| Mean I/sigma(I)                   | 21.12 (5.38)                   | 19.67 (4.07)                   | 21.02 (4.49)                   | 21.35 (5.06)                   | 19.46 (4.81)                   |
| Wilson B-factor (Å <sup>2</sup> ) | 17.9                           | 17.46                          | 17.02                          | 16.78                          | 16.57                          |
| R-merge                           | 0.0691 (0.1911)                | 0.0708 (0.2484)                | 0.0651 (0.289)                 | 0.0664 (0.3043)                | 0.0729 (0.3116)                |
| R-meas                            | 0.0730 (0.2208)                | 0.0747 (0.2876)                | 0.0686 (0.3166)                | 0.0699 (0.3253)                | 0.0766 (0.3324)                |
| R-pim                             | 0.0227 (0.1083)                | 0.0232 (0.1419)                | 0.0210 (0.1249)                | 0.0212 (0.1110)                | 0.0230 (0.1122)                |
| CC1/2                             | 0.999 (0.959)                  | 0.999 (0.938)                  | 0.999 (0.939)                  | 0.999 (0.952)                  | 0.999 (0.949)                  |

**Supplementary Table 2:** Data collection statistics for Thaumatococcus. Numbers in parentheses refer to the highest resolution data shell.

|                                   | Insulin                       |                               |                               |                               |                               |
|-----------------------------------|-------------------------------|-------------------------------|-------------------------------|-------------------------------|-------------------------------|
| Energy (keV)                      | 4                             | 4.25                          | 4.5                           | 4.75                          | 5                             |
| Wavelength (Å)                    | 3.099                         | 2.917                         | 2.755                         | 2.610                         | 2.479                         |
| Resolution range (Å)              | 39.11 - 1.99<br>(2.06 - 1.99) | 55.32 - 1.87<br>(1.94 - 1.87) | 55.32 - 1.80<br>(1.86 - 1.80) | 55.33 - 1.8<br>(1.86 - 1.80)  | 55.33 - 1.80<br>(1.86 - 1.80) |
| Space group                       | $I 2_1 3$                     |                               |                               |                               |                               |
| Unit cell dimensions (Å,°)        | 78.22 78.22 78.22<br>90 90 90 | 78.23 78.23 78.23<br>90 90 90 | 78.24 78.24 78.24<br>90 90 90 | 78.25 78.25 78.25<br>90 90 90 | 78.26 78.26 78.26<br>90 90 90 |
| Total reflections                 | 121565 (3748)                 | 140728 (4656)                 | 171255 (8918)                 | 184712 (13884)                | 192812 (14503)                |
| Unique reflections                | 10518 (995)                   | 12349 (1214)                  | 14380 (1469)                  | 14389 (1478)                  | 14393 (1474)                  |
| Multiplicity                      | 11.6 (3.8)                    | 11.4 (3.8)                    | 11.9 (6.1)                    | 12.8 (9.4)                    | 13.4 (9.8)                    |
| Completeness (%)                  | 99.53 (95.31)                 | 97.45 (95.82)                 | 99.85 (98.65)                 | 99.94 (99.46)                 | 99.60 (96.15)                 |
| Mean I/sigma(I)                   | 18.69 (1.89)                  | 15.66 (0.94)                  | 15.67 (0.74)                  | 15.26 (0.61)                  | 12.49 (0.30)                  |
| Wilson B-factor (Å <sup>2</sup> ) | 37.18                         | 38.48                         | 38.38                         | 39.4                          | 41.46                         |
| R-merge                           | 0.0671 (0.4596)               | 0.0729 (0.7336)               | 0.0713 (1.045)                | 0.0764 (1.2590)               | 0.0934 (1.6040)               |
| R-meas                            | 0.0696 (0.5324)               | 0.0756 (0.8478)               | 0.0739 (1.1420)               | 0.0791 (1.3310)               | 0.0966 (1.6930)               |
| R-pim                             | 0.0182 (0.2630)               | 0.0197 (0.4157)               | 0.0191 (0.4459)               | 0.0201 (0.4283)               | 0.0241 (0.5337)               |
| CC1/2                             | 1 (0.752)                     | 1 (0.576)                     | 1 (0.439)                     | 0.999 (0.542)                 | 0.999 (0.406)                 |

**Supplementary Table 3:** Data collection statistics for Insulin. Numbers in parentheses refer to the highest resolution data shell.

|                                   | Lysozyme                      |                               |                               |                               |                               |
|-----------------------------------|-------------------------------|-------------------------------|-------------------------------|-------------------------------|-------------------------------|
| Energy (keV)                      | 4                             | 4.25                          | 4.5                           | 4.75                          | 5                             |
| Wavelength (Å)                    | 3.099                         | 2.917                         | 2.755                         | 2.610                         | 2.479                         |
| Resolution range (Å)              | 55.69 - 1.99<br>(2.06 - 1.99) | 55.69 - 1.87<br>(1.94 - 1.87) | 55.69 - 1.79<br>(1.85 - 1.79) | 55.69 - 1.79<br>(1.86 - 1.79) | 55.70 - 1.79<br>(1.86 - 1.79) |
| Space group                       | $P 4_3 2_1 2$                 |                               |                               |                               |                               |
| Unit cell dimensions (Å,°)        | 78.76 78.76 37.02<br>90 90 90 | 78.75 78.75 37.01<br>90 90 90 | 78.76 78.76 37.02<br>90 90 90 | 78.76 78.76 37.02<br>90 90 90 | 78.78 78.78 37.02<br>90 90 90 |
| Total reflections                 | 115688 (3780)                 | 136765 (4459)                 | 162711 (7532)                 | 175474 (12076)                | 181838 (12677)                |
| Unique reflections                | 14135 (1199)                  | 16882 (1444)                  | 19467 (1684)                  | 19744 (1824)                  | 19927 (1861)                  |
| Multiplicity                      | 8.2 (3.2)                     | 8.1 (3.1)                     | 8.4 (4.5)                     | 8.9 (6.6)                     | 9.1 (6.8)                     |
| Completeness (%)                  | 92.98 (78.31)                 | 92.57 (78.48)                 | 93.40 (79.46)                 | 95.12 (87.48)                 | 96.02 (89.17)                 |
| Mean I/sigma(I)                   | 14.66 (4.17)                  | 16.92 (4.65)                  | 17.02 (4.68)                  | 18.44 (5.93)                  | 22.45 (8.86)                  |
| Wilson B-factor (Å <sup>2</sup> ) | 23.79                         | 22.71                         | 21.32                         | 21.54                         | 20.83                         |
| R-merge                           | 0.1039 (0.3168)               | 0.0870 (0.2505)               | 0.0867 (0.3190)               | 0.0797 (0.3166)               | 0.0679 (0.2038)               |
| R-meas                            | 0.1098 (0.3788)               | 0.0918 (0.3013)               | 0.0913 (0.3600)               | 0.0837 (0.3431)               | 0.0713 (0.2198)               |
| R-pim                             | 0.0345 (0.2042)               | 0.0284 (0.1644)               | 0.0279 (0.1616)               | 0.0252 (0.1292)               | 0.0211 (0.0806)               |
| CC1/2                             | 0.996 (0.884)                 | 0.997 (0.925)                 | 0.998 (0.926)                 | 0.998 (0.954)                 | 0.998 (0.976)                 |

**Supplementary Table 4:** Data collection statistics for Lysozyme. Numbers in parentheses refer to the highest resolution data shell.

|                                   | LMO4_0                      | LMO4_0.25        | LMO4_0.5         | LMO4_1           | LMO4_2           | LMO4_4           |
|-----------------------------------|-----------------------------|------------------|------------------|------------------|------------------|------------------|
| Wavelength (Å)                    | 1.281                       |                  |                  |                  |                  |                  |
| Resolution range (Å)              | 53.49 - 2.10 (2.14 - 2.10)  |                  |                  |                  |                  |                  |
| Space group                       | P 3 1 2                     |                  |                  |                  |                  |                  |
| Unit cell dimensions (Å,°)        | 61.77 61.77 92.77 90 90 120 |                  |                  |                  |                  |                  |
| Total reflections                 | 119348<br>(6212)            | 119217<br>(6186) | 119225<br>(6189) | 119312<br>(6193) | 119449<br>(6200) | 119532<br>(6196) |
| Unique reflections                | 12070 (604)                 | 12068 (601)      | 12068 (601)      | 12068 (601)      | 12068 (601)      | 12067 (601)      |
| Multiplicity                      | 9.9 (10.3)                  | 9.9 (10.3)       | 9.9 (10.3)       | 9.9 (10.3)       | 9.9 (10.3)       | 9.9 (10.3)       |
| Completeness (%)                  | 99.9 (99.5)                 | 99.9 (99.5)      | 99.9 (99.5)      | 99.9 (99.5)      | 99.9 (99.5)      | 99.9 (99.5)      |
| Mean I/sigma(I)                   | 16.6 (1.5)                  | 14.0 (0.9)       | 12.6 (0.7)       | 11.1 (0.5)       | 9.5 (0.4)        | 7.8 (0.3)        |
| Wilson B-factor (Å <sup>2</sup> ) | 34.46                       | 34.12            | 33.81            | 32.67            | 31.77            | 29.8             |
| R-merge                           | 0.099 (0.770)               | 0.117 (1.273)    | 0.129 (1.578)    | 0.148 (2.130)    | 0.176 (3.265)    | 0.218<br>(3.994) |
| R-meas                            | 0.105 (0.810)               | 0.123 (1.340)    | 0.136 (1.660)    | 0.156 (2.242)    | 0.186 (3.436)    | 0.230<br>(4.202) |
| R-pim                             | 0.033 (0.248)               | 0.039 (0.413)    | 0.043 (0.511)    | 0.049 (0.692)    | 0.059 (1.060)    | 0.072<br>(1.296) |
| CC1/2                             | 0.993 (0.853)               | 0.992 (0.659)    | 0.992 (0.614)    | 0.992 (0.431)    | 0.991 (0.192)    | 0.990<br>(0.178) |
| Anomalous completeness            | 99.9 (99.7)                 | 99.9 (99.5)      | 99.9 (99.6)      | 99.9 (99.6)      | 99.9 (99.6)      | 99.9 (99.6)      |
| Anomalous multiplicity            | 5.2 (5.3)                   | 5.2 (5.3)        | 5.2 (5.3)        | 5.2 (5.3)        | 5.2 (5.3)        | 5.2 (5.3)        |
| Anomalous correlation             | 0.654 (0.030)               | 0.553 (0)        | 0.568 (0.013)    | 0.484 (0)        | 0.435 (0)        | 0.348<br>(0.030) |
| Anomalous slope                   | 0.964                       | 0.808            | 0.742            | 0.701            | 0.638            | 0.583            |
| Anomalous peak heights (σ)        |                             |                  |                  |                  |                  |                  |
| ZN1                               | 27.55                       | 24.96            | 23.23            | 22.05            | 20.27            | 19.4             |
| ZN2                               | 24.47                       | 22.48            | 21.06            | 20.07            | 17.8             | 16.7             |
| ZN3                               | 21.14                       | 19.41            | 18.57            | 17.95            | 17.6             | 15.36            |
| ZN4                               | 19.66                       | 18.16            | 18.07            | 17.21            | 16.47            | 15.22            |

**Supplementary Table 5:** LMO4 data collection processing statistics and anomalous peak heights shown for different detector background noise levels (0, 0.25, 0.5, 1, 2, 4). Numbers in parentheses refer to the highest resolution data shell.

|                                   | Thaumat_0                                | Thaumat_0.25  | Thaumat_0.5   | Thaumat_1     | Thaumat_2     | Thaumat_4     |
|-----------------------------------|------------------------------------------|---------------|---------------|---------------|---------------|---------------|
| Wavelength (Å)                    | 2.755                                    |               |               |               |               |               |
| Resolution range (Å)              | 150.7 - 1.80 (1.83 - 1.80)               |               |               |               |               |               |
| Space group                       | <i>P</i> 4 <sub>1</sub> 2 <sub>1</sub> 2 |               |               |               |               |               |
| Unit cell dimensions (Å, °)       | 58.02 58.02 150.70 90.00 90.00 90.00     |               |               |               |               |               |
| Total reflections                 | 182073 (3578)                            | 182088 (3576) | 182180 (3579) | 182271 (3579) | 182427 (3583) | 182729 (3589) |
| Unique reflections                | 23745 (1030)                             | 23746 (1030)  | 23746 (1030)  | 23747 (1030)  | 23748 (1030)  | 23748 (1030)  |
| Multiplicity                      | 7.7 (3.5)                                | 7.7 (3.5)     | 7.7 (3.5)     | 7.7 (3.5)     | 7.7 (3.5)     | 7.7 (3.5)     |
| Completeness (%)                  | 96.1 (86.3)                              | 96.1 (86.3)   | 96.1 (86.3)   | 96.1 (86.3)   | 96.1 (86.3)   | 96.1 (86.3)   |
| Mean I/sigma(I)                   | 42.2 (11.9)                              | 41.7 (11.6)   | 40.0 (10.4)   | 38.5 (9.5)    | 35.1 (7.6)    | 31.6 (6.1)    |
| Wilson B-factor (Å <sup>2</sup> ) | 13.45                                    | 13.52         | 13.57         | 13.63         | 13.55         | 13.51         |
| R-merge                           | 0.045 (0.129)                            | 0.046 (0.137) | 0.047 (0.143) | 0.048 (0.154) | 0.051 (0.178) | 0.055 (0.212) |
| R-meas                            | 0.048 (0.152)                            | 0.049 (0.161) | 0.050 (0.168) | 0.051 (0.182) | 0.054 (0.210) | 0.058 (0.250) |
| R-pim                             | 0.016 (0.079)                            | 0.016 (0.083) | 0.016 (0.087) | 0.017 (0.094) | 0.018 (0.109) | 0.020 (0.129) |
| CC1/2                             | 0.999 (0.976)                            | 0.999 (0.974) | 0.999 (0.972) | 0.999 (0.968) | 0.999 (0.959) | 0.999 (0.948) |
| Anomalous completeness            | 93.4 (66.1)                              | 93.4 (66.1)   | 93.4 (66.1)   | 93.4 (66.1)   | 93.4 (66.1)   | 93.5 (66.2)   |
| Anomalous multiplicity            | 4.2 (2.1)                                | 4.2 (2.1)     | 4.2 (2.1)     | 4.2 (2.1)     | 4.2 (2.1)     | 4.2 (2.1)     |
| Anomalous correlation             | 0.558 (0.095)                            | 0.551 (0.083) | 0.533 (0.053) | 0.509 (0.038) | 0.488 (0.020) | 0.482 (0.020) |
| Anomalous slope                   | 1.937                                    | 1.95          | 1.85          | 1.802         | 1.606         | 1.477         |
| Anomalous peak heights (σ)        |                                          |               |               |               |               |               |
| CYS9                              | 23.56                                    | 23.19         | 22.53         | 22.02         | 21.68         | 20.36         |
| CYS56                             | 22.84                                    | 22.66         | 21.98         | 21.78         | 21.43         | 19.65         |
| MET112                            | 22.17                                    | 21.93         | 21.58         | 20.93         | 19.76         | 19            |
| CYS145                            | 21.49                                    | 21.11         | 20.71         | 19.68         | 19.26         | 18.25         |
| CYS149                            | 20.77                                    | 20.5          | 20.38         | 19.56         | 18.74         | 18.16         |
| CYS77                             | 20.44                                    | 20.39         | 19.96         | 19.02         | 18.4          | 18.08         |
| CYS134                            | 20.43                                    | 19.74         | 19.85         | 18.95         | 18.19         | 17.91         |
| CYS204                            | 19.77                                    | 19.41         | 18.75         | 18.37         | 17.44         | 16.87         |
| CYS193                            | 18.77                                    | 18.45         | 18.52         | 18.24         | 17.4          | 16.8          |
| CYS164                            | 17.47                                    | 17.22         | 17.36         | 16.78         | 15.92         | 15.84         |
| CYS158                            | 17.23                                    | 16.8          | 16.73         | 16.14         | 15.89         | 15.3          |
| CYS66                             | 17.23                                    | 16.73         | 16.5          | 15.9          | 15.7          | 14.99         |
| CYS121                            | 16.66                                    | 16.41         | 16.16         | 15.89         | 15.54         | 14.57         |
| CYS126                            | 16.39                                    | 15.99         | 15.96         | 15.29         | 15.3          | 14.43         |
| CYS71                             | 16.06                                    | 15.82         | 15.15         | 14.97         | 14.92         | 14.01         |
| CYS177                            | 14.35                                    | 14.4          | 14.45         | 13.96         | 13.98         | 13.5          |
| CYS159                            | 10.34                                    | 10.31         | 9.78          | 9.65          | 8.96          | 8.55          |

**Supplementary Table 6:** Thaumat data collection processing statistics and anomalous peak heights shown for different detector background noise levels for thaumat (0, 0.25, 0.5, 1, 2, 4). Numbers in parentheses refer to the highest resolution data shell.

|                                    | RNase A                          | Petase                          | ThcOx                             | SseK3                              | PAS                               | Seb1-RRM                       | AcrB                              | McjD                                           | A <sub>2a</sub> R               | mPGES                           |
|------------------------------------|----------------------------------|---------------------------------|-----------------------------------|------------------------------------|-----------------------------------|--------------------------------|-----------------------------------|------------------------------------------------|---------------------------------|---------------------------------|
| Wavelength (Å)                     | 2.755                            | 2.455                           | 3.09                              | 2.755                              | 3.09                              | 2.755                          | 3.024                             | 2.755                                          | 2.755                           | 2.755                           |
| Resolution range (Å)               | 41.10-1.80<br>(1.86-1.80)        | 67.32-1.70<br>(1.76-1.70)       | 74.06-3.20<br>(3.31-3.20)         | 49.88-2.10<br>(2.17-2.10)          | 72.28-2.50<br>(2.59-2.50)         | 54.87-1.77<br>(1.83-1.77)      | 28.94-3.40<br>(3.52-3.40)         | 54.66-2.80<br>(2.9-2.80)                       | 89.82-2.40<br>(2.48-2.40)       | 45.07-1.77<br>(1.83-1.77)       |
| Space group                        | C 2                              | C 2 2 2 <sub>1</sub>            | P 4 <sub>1</sub> 2 <sub>1</sub> 2 | P 2 <sub>1</sub>                   | P 2 <sub>1</sub> 2 <sub>1</sub> 2 | C 2                            | R 3 2                             | P 2 <sub>1</sub> 2 <sub>1</sub> 2 <sub>1</sub> | C 2 2 2 <sub>1</sub>            | R 3                             |
| Unit cell (Å, °)                   | 99.98 32.62 72.49<br>90 90.16 90 | 52.56 234.31<br>164.53 90 90 90 | 111.39 111.39<br>217.52 90 90 90  | 96.08 75.02 101.89<br>90 109.51 90 | 54.91 144.56<br>48.65 90 90 90    | 111.10 46.90<br>32.30 90 99 90 | 145.30 145.30<br>516.84 90 90 120 | 81.19 109.32<br>233.35 90 90 90                | 39.31 179.64<br>139.54 90 90 90 | 77.20 77.20<br>122.06 90 90 120 |
| Total reflections                  | 315464 (11569)                   | 929649 (68871)                  | 552822 (43942)                    | 1430296 (110092)                   | 613436 (48055)                    | 63471 (2083)                   | 2555066 (211481)                  | 2830105 (215179)                               | 941156 (76379)                  | 456856 (16728)                  |
| Unique reflections                 | 17977 (1412)                     | 95266 (8111)                    | 21407 (1817)                      | 62053 (4943)                       | 12470 (1065)                      | 10445 (653)                    | 29410 (2892)                      | 51873 (5092)                                   | 19968 (1997)                    | 26090 (2383)                    |
| Multiplicity                       | 17.5 (8.2)                       | 9.8 (8.4)                       | 25.8 (24.2)                       | 23.0 (22.3)                        | 49.2 (45.1)                       | 6.1 (3.2)                      | 86.9 (73.1)                       | 54.6 (42.3)                                    | 47.1 (38.2)                     | 17.5 (7.0)                      |
| Completeness (%)                   | 81.29 (65.04)                    | 84.90 (73.12)                   | 91.63 (79.76)                     | 77.31 (60.81)                      | 81.04 (78.66)                     | 64.89 (41.43)                  | 99.70 (99.90)                     | 96.80 (86.27)                                  | 99.97 (99.95)                   | 97.51 (75.83)                   |
| Mean I/sigma(I)                    | 24.67 (5.03)                     | 18.02 (1.44)                    | 29.98 (2.10)                      | 13.34 (1.79)                       | 41.69 (2.39)                      | 22.91 (3.26)                   | 31.15 (0.97)                      | 12.48 (0.27)                                   | 18.63 (0.99)                    | 21.23 (0.48)                    |
| Wilson B-factor (Å <sup>2</sup> )  | 27.82                            | 30.34                           | 134.61                            | 36.18                              | 64.86                             | 23.2                           | 148.42                            | 105.17                                         | 54.09                           | 36.09                           |
| R-merge                            | 0.0929 (0.3414)                  | 0.0638 (1.1350)                 | 0.0715 (1.5970)                   | 0.1655 (1.7960)                    | 0.0829 (1.4330)                   | 0.0451 (0.2519)                | 0.1595 (5.3240)                   | 0.2146 (12.0700)                               | 0.2115 (3.602)                  | 0.0820 (3.4900)                 |
| R-meas                             | 0.0954 (0.3644)                  | 0.0672 (1.2110)                 | 0.0729 (1.6310)                   | 0.1693 (1.8400)                    | 0.0838 (1.4500)                   | 0.0491 (0.2998)                | 0.1604 (5.3610)                   | 0.2167 (12.2100)                               | 0.2138 (3.6480)                 | 0.0840 (3.7900)                 |
| R-pim                              | 0.0210 (0.1200)                  | 0.0204 (0.4067)                 | 0.0141 (0.3212)                   | 0.0348 (0.3808)                    | 0.0117 (0.2083)                   | 0.0189 (0.1586)                | 0.0172 (0.6205)                   | 0.02965 (1.834)                                | 0.03035 (0.5679)                | 0.0178 (1.4140)                 |
| CC1/2                              | 0.995 (0.915)                    | 0.999 (0.837)                   | 0.999 (0.722)                     | 0.997 (0.703)                      | 0.998 (0.636)                     | 0.999 (0.919)                  | 1 (0.52)                          | 0.998 (0.675)                                  | 0.999 (0.518)                   | 0.999 (0.21)                    |
| CC*                                | 0.999 (0.977)                    | 1 (0.955)                       | 1 (0.916)                         | 0.999 (0.909)                      | 1 (0.882)                         | 1 (0.979)                      | 1 (0.827)                         | 1 (0.898)                                      | 1 (0.826)                       | 1 (0.59)                        |
| Reflections for refinement         | 17964 (1410)                     | 95080 (8099)                    | 21403 (1817)                      | 62053 (4831)                       | 11378 (1065)                      | 10395 (650)                    | 29401 (2891)                      | 50341 (4424)                                   | 19963 (1997)                    | 25682 (1995)                    |
| Reflections for R-free             | 901 (65)                         | 4672 (409)                      | 2000 (169)                        | 2963 (227)                         | 549 (53)                          | 545 (28)                       | 1501 (154)                        | 2491 (212)                                     | 1032 (91)                       | 1255 (112)                      |
| R-work                             | 0.2253 (0.3241)                  | 0.1935 (0.4192)                 | 0.2021 (0.3553)                   | 0.2519 (0.4451)                    | 0.2384 (0.3163)                   | 0.1547 (0.1878)                | 0.3010 (0.4131)                   | 0.2750 (0.3236)                                | 0.2224 (0.3244)                 | 0.1942 (0.4811)                 |
| R-free                             | 0.2556 (0.3645)                  | 0.1979 (0.3926)                 | 0.2311 (0.3991)                   | 0.2932 (0.4323)                    | 0.2759 (0.3938)                   | 0.1883 (0.2685)                | 0.3100 (0.4527)                   | 0.2950 (0.3405)                                | 0.2608 (0.4005)                 | 0.2126 (0.4706)                 |
| CC(work)                           | 0.929 (0.816)                    | 0.963 (0.889)                   | 0.951 (0.722)                     | 0.939 (0.712)                      | 0.947 (0.726)                     | 0.965 (0.896)                  | 0.856 (0.475)                     | 0.809 (0.675)                                  | 0.797 (0.689)                   | 0.920 (0.373)                   |
| CC(free)                           | 0.944 (0.667)                    | 0.957 (0.898)                   | 0.961 (0.652)                     | 0.931 (0.714)                      | 0.939 (0.195)                     | 0.956 (0.716)                  | 0.765 (0.366)                     | 0.610 (0.733)                                  | 0.968 (0.508)                   | 0.896 (0.381)                   |
| Number of non-H atoms              | 2035                             | 6622                            | 7289                              | 9913                               | 2674                              | 1277                           | 7854                              | 9060                                           | 3321                            | 1250                            |
| RMS(bonds/angles) (Å, °)           | 0.009/1.52                       | 0.004/1.01                      | 0.002/0.49                        | 0.008/1.30                         | 0.009/1.15                        | 0.010/1.09                     | 0.009/1.01                        | 0.009/0.98                                     | 0.008/1.21                      | 0.010/1.03                      |
| Ramachandran* (%)                  | 97.45/2.55/0                     | 97.83/2.17/0                    | 96.69/3.2/0.11                    | 98.44/1.56/0                       | 100/0/0                           | 96.67/3.33/0                   | 96.22/3.29/0.6                    | 98.13/1.87/0                                   | 98.18/1.82/0                    | 99.31/0.69/0                    |
| Rotamer outliers (%)               | 0                                | 0                               | 0.76                              | 1.13                               | 1.71                              | 0                              | 0.6                               | 0.48                                           | 0.96                            | 0                               |
| Clashscore                         | 3.53                             | 1.23                            | 4.81                              | 4.55                               | 3.99                              | 2.93                           | 8.14                              | 7.27                                           | 3.24                            | 5.28                            |
| Average B-factor (Å <sup>2</sup> ) | 25.06                            | 36.19                           | 140.41                            | 46.67                              | 60.4                              | 24.27                          | 180.06                            | 164.68                                         | 61.98                           | 31.95                           |
| PDB code                           | 8PX0                             | 6EQD                            | 8PZ5                              | 8PX1                               | 8PX4                              | 8PX5                           | 8PX7                              | 8PX9                                           | 8PWN                            | 8PYV                            |

**Supplementary Table 7:** Data collection and processing statistics for S-SAD experiments. *\*favored/allowed/outliers*. Numbers in parentheses refer to the highest resolution data shell.



|                                    | Fap1 (Ca,S)                        | AlgE (Ca,S)                       | NaK2K (K)                     | Streptactin (Cl)               | SERCA (V)                           | TauA (I)                                       | GP1 (Cd)                         | RNA G (K)                         | IRF4 (P,S)                      |
|------------------------------------|------------------------------------|-----------------------------------|-------------------------------|--------------------------------|-------------------------------------|------------------------------------------------|----------------------------------|-----------------------------------|---------------------------------|
| Wavelength (Å)                     | 3.066                              | 2.755                             | 3.350                         | 2.755                          | 2.260                               | 2.375                                          | 2.755                            | 3.351                             | 2.755                           |
| Resolution range (Å)               | 65.53-1.97<br>(2.04-1.97)          | 56.58-1.77<br>(1.83-1.77)         | 48.13-2.26<br>(2.34-2.26)     | 54.47-1.80<br>(1.86-1.80)      | 64.59-3.13<br>(3.24-3.13)           | 65.47-1.77<br>(1.83-1.77)                      | 46.26-2.75<br>(2.84-2.75)        | 28.47-2.19<br>(2.27-2.192)        | 64.02-2.60<br>(2.69-2.60)       |
| Space group                        | C 2                                | C 2                               | I 4                           | I 4 <sub>1</sub> 2 2           | P 2 <sub>1</sub>                    | P 2 <sub>1</sub> 2 <sub>1</sub> 2 <sub>1</sub> | P 6 <sub>3</sub> 2 2             | P 2                               | C 2 2 2 <sub>1</sub>            |
| Unit cell (Å,°)                    | 132.81 30.40 90.60<br>90 127.04 90 | 57.35 74.69 115.9<br>90 102.48 90 | 68.07 68.07<br>89.38 90 90 90 | 57.42 57.42<br>172.05 90 90 90 | 131.14 94.39 135.11<br>90 107.05 90 | 45.01 71.32<br>165.03 90 90 90                 | 106.83 106.83<br>74.86 90 90 120 | 29.87 23.66 31.06<br>90 107.61 90 | 77.88 112.44<br>140.66 90 90 90 |
| Total reflections                  | 222112 (7826)                      | 1206282 (44200)                   | 152313 (11328)                | 601286 (22212)                 | 4339345 (388923)                    | 877552 (64950)                                 | 207964 (17438)                   | 16129 (632)                       | 1561923 (123304)                |
| Unique reflections                 | 17626 (1321)                       | 45199 (4019)                      | 9459 (915)                    | 13199 (1190)                   | 55956 (5572)                        | 45258 (3837)                                   | 6783 (608)                       | 2064 (178)                        | 19282 (1865)                    |
| Multiplicity                       | 12.6 (5.9)                         | 26.7 (11.0)                       | 16.1 (12.4)                   | 45.6 (18.7)                    | 77.5 (69.8)                         | 19.4 (16.9)                                    | 30.7 (28.7)                      | 7.8 (3.6)                         | 81.0 (66.1)                     |
| Completeness (%)                   | 84.33 (64.41)                      | 96.76 (85.58)                     | 98.82 (96.11)                 | 95.25 (87.22)                  | 99.92 (99.86)                       | 85.68 (73.52)                                  | 97.20 (90.21)                    | 91.86 (78.76)                     | 99.24 (98.10)                   |
| Mean I/sigma(I)                    | 20.29 (8.67)                       | 27.32 (2.51)                      | 42.21 (14.82)                 | 35.10 (3.29)                   | 20.96 (1.04)                        | 15.63 (2.65)                                   | 21.54 (0.88)                     | 14.00 (3.25)                      | 41.49 (1.65)                    |
| Wilson B-factor (Å <sup>2</sup> )  | 14.73                              | 23.68                             | 35.16                         | 21.71                          | 98.58                               | 27.89                                          | 102.96                           | 46.43                             | 79.21                           |
| R-merge                            | 0.1122 (0.1941)                    | 0.0880 (0.8345)                   | 0.0559 (0.1548)               | 0.0915 (0.9932)                | 0.2977 (4.4450)                     | 0.1341 (0.8778)                                | 0.1404 (3.4180)                  | 0.1120 (0.3353)                   | 0.1029 (2.7600)                 |
| R-meas                             | 0.1169 (0.2123)                    | 0.0895 (0.8775)                   | 0.0575 (0.1617)               | 0.0924 (1.0210)                | 0.2997 (4.4770)                     | 0.1376 (0.9050)                                | 0.1428 (3.4810)                  | 0.1193 (0.3943)                   | 0.1035 (2.7810)                 |
| R-pim                              | 0.0309 (0.0808)                    | 0.0156 (0.2598)                   | 0.0132 (0.0455)               | 0.0127 (0.2268)                | 0.0339 (0.5261)                     | 0.0297 (0.2118)                                | 0.0252 (0.6358)                  | 0.0392 (0.2016)                   | 0.0109 (0.3168)                 |
| CC1/2                              | 0.99 (0.962)                       | 0.999 (0.903)                     | 0.995 (0.99)                  | 1 (0.84)                       | 0.968 (0.642)                       | 0.997 (0.777)                                  | 0.999 (0.567)                    | 0.994 (0.857)                     | 1 (0.75)                        |
| CC*                                | 0.998 (0.99)                       | 1 (0.974)                         | 0.999 (0.997)                 | 1 (0.955)                      | 0.992 (0.884)                       | 0.999 (0.935)                                  | 1 (0.851)                        | 0.998 (0.961)                     | 1 (0.926)                       |
| Reflections for refinement         | 17622 (1321)                       | 45084 (3964)                      | 9457 (915)                    | 13196 (1188)                   | 55923 (5564)                        | 45248 (3837)                                   | 6764 (599)                       | 2053 (178)                        | 19219 (1862)                    |
| Reflections for R-free             | 900 (73)                           | 1987 (178)                        | 478 (37)                      | 620 (51)                       | 2815 (287)                          | 2251 (191)                                     | 352 (16)                         | 124 (7)                           | 906 (77)                        |
| R-work                             | 0.1832 (0.2181)                    | 0.1811 (0.2998)                   | 0.1817 (0.1682)               | 0.1737 (0.3225)                | 0.2053 (0.3846)                     | 0.2102 (0.4207)                                | 0.2449 (0.5652)                  | 0.2292 (0.3093)                   | 0.2237 (0.4512)                 |
| R-free                             | 0.2229 (0.2600)                    | 0.1906 (0.2732)                   | 0.2233 (0.2240)               | 0.1936 (0.3715)                | 0.2607 (0.4354)                     | 0.2319 (0.4379)                                | 0.2829 (0.5122)                  | 0.2750 (0.4517)                   | 0.2499 (0.4797)                 |
| CC(work)                           | 0.947 (0.911)                      | 0.962 (0.883)                     | 0.939 (0.956)                 | 0.946 (0.843)                  | 0.905 (0.744)                       | 0.951 (0.819)                                  | 0.937 (0.682)                    | 0.959 (0.806)                     | 0.956 (0.749)                   |
| CC(free)                           | 0.925 (0.922)                      | 0.958 (0.877)                     | 0.956 (0.910)                 | 0.922 (0.734)                  | 0.864 (0.728)                       | 0.945 (0.824)                                  | 0.944 (0.203)                    | 0.929 (0.405)                     | 0.919 (0.542)                   |
| Number of non-H atoms              | 2211                               | 4134                              | 1542                          | 1053                           | 15376                               | 4848                                           | 1218                             | 410                               | 3666                            |
| RMS(bonds/angles) (Å,°)            | 0.011/1.58                         | 0.006/0.86                        | 0.015/1.35                    | 0.008/1.21                     | 0.005/1.05                          | 0.010/1.6                                      | 0.006/1.03                       | 0.008/1.29                        | 0.01/1.25                       |
| Ramachandran* (%)                  | 96.8/3.2/0                         | 96.54/3.46/0                      | 98.91/1.09/0                  | 94.26/5.74/0                   | 94.67/5.02/0.31                     | 98.65/1.01/0.34                                | 97.92/2.08/0                     | n/a                               | 98.48/1.52/0                    |
| Rotamer outliers (%)               | 0.46                               | 0                                 | 1.19                          | 1.02                           | 4.94                                | 0.62                                           | 2.99                             | n/a                               | 0.34                            |
| Clashscore                         | 1.29                               | 4.97                              | 5.48                          | 4.68                           | 13.15                               | 3.6                                            | 7.59                             | 15.6                              | 4.2                             |
| Average B-factor (Å <sup>2</sup> ) | 17.5                               | 33.99                             | 39.42                         | 21.35                          | 124.48                              | 28.81                                          | 120.12                           | 57.35                             | 115.84                          |
| PDB code                           | 8PXC                               | 8PZ4                              | 6DZ1                          | 8PXG                           | 6YSO                                | 8PXH                                           | 8PXJ                             | 6JH                               | 7O56                            |

**Supplementary Table 8:** Data collection and processing statistics for non S-SAD experiments. The anomalous scatterer used for phasing is indicated in parenthesis in the first row. \**avored/allowed/outliers*. Numbers in parentheses refer to the highest resolution data shell.

|                                    | OmpK36 (S)                      | BphA4 (P)                    | BphA4                        |
|------------------------------------|---------------------------------|------------------------------|------------------------------|
| Wavelength (Å)                     | 4.133                           | 5.767                        | 1.378                        |
| Resolution range (Å)               | 82.80-2.70 (2.79- 2.70)         | 76.07-3.77 (3.90-3.77)       | 38.06-1.60 (1.65-1.60)       |
| Space group                        | C 2                             | P 6 <sub>1</sub> 2 2         | P 6 <sub>1</sub> 2 2         |
| Unit cell (Å, °)                   | 233.03 74.36 90.12 90 112.04 90 | 98.19 98.19 170.29 90 90 120 | 98.24 98.24 170.48 90 90 120 |
| Total reflections                  | 860804 (33410)                  | 54693 (1834)                 | 1151500 (98013)              |
| Unique reflections                 | 38517 (3499)                    | 4614 (373)                   | 63940 (6081)                 |
| Multiplicity                       | 22.3 (9.5)                      | 11.9 (4.9)                   | 18.0 (16.1)                  |
| Completeness (%)                   | 97.40 (89.46)                   | 86.62 (74.45)                | 98.90 (95.69)                |
| Mean I/sigma(I)                    | 24.03 (4.69)                    | 21.38 (12.17)                | 23.51 (0.76)                 |
| Wilson B-factor (Å <sup>2</sup> )  | 48.84                           | 33.9                         | 29.47                        |
| R-merge                            | 0.1001 (0.3662)                 | 0.1448 (0.1385)              | 0.0656 (2.1020)              |
| R-meas                             | 0.1025 (0.3860)                 | 0.1507 (0.1529)              | 0.0675 (2.1700)              |
| R-pim                              | 0.0208 (0.1160)                 | 0.0401 (0.0630)              | 0.0155 (0.5286)              |
| CC1/2                              | 0.996 (0.957)                   | 0.995 (0.987)                | 1 (0.467)                    |
| CC*                                | 0.999 (0.989)                   | 0.999 (0.997)                | 1 (0.798)                    |
| Reflections for refinement         | 38449 (3498)                    | 4614 (373)                   | 63940 (6066)                 |
| Reflections for R-free             | 1987 (186)                      | 228 (23)                     | 3150 (322)                   |
| R-work                             | 0.1987 (0.2649)                 | 0.1853 (0.2194)              | 0.1777 (0.3583)              |
| R-free                             | 0.2410 (0.2985)                 | 0.1907 (0.2878)              | 0.2061 (0.3729)              |
| CC(work)                           | 0.920 (0.880)                   | 0.937 (0.898)                | 0.963 (0.686)                |
| CC(free)                           | 0.914 (0.814)                   | 0.929 (0.861)                | 0.952 (0.635)                |
| Number of non-H atoms              | 8278                            | 3058                         | 3422                         |
| RMS(bonds/angles) (Å, °)           | 0.002/0.53                      | 0.01/1.60                    | 0.009/1.54                   |
| Ramachandran* (%)                  | 95.34/4.66/0                    | 97.76/2.24/0                 | 98/2/2                       |
| Rotamer outliers (%)               | 0.97                            | 0                            | 0.32                         |
| Clashscore                         | 4.5                             | 2.61                         | 2.23                         |
| Average B-factor (Å <sup>2</sup> ) | 53.92                           | 38.56                        | 29.1                         |
| PDB code                           | 8PYZ                            | 8P XK                        | 8P XL                        |

**Supplementary Table 9:** Data collection and processing statistics for SAD experiments on laser shaped crystals. \**favored/allowed/outliers*. The anomalous scatterer used for phasing is indicated in parenthesis in the first row. Numbers in parentheses refer to the highest resolution data shell.

|           | RNase A      | Petase       | ThcOx        | Ssek3        | PAS          | Seb1-RRM     | AcrB         | McjD         | A <sub>2</sub> A | mPGES        | OmpK36       |
|-----------|--------------|--------------|--------------|--------------|--------------|--------------|--------------|--------------|------------------|--------------|--------------|
| Scatterer | S            |              |              |              |              |              |              |              |                  |              |              |
| 1         | <b>15.54</b> | <b>23.17</b> | <b>16.01</b> | <b>16.01</b> | <b>19.83</b> | <b>20.73</b> | <b>15.74</b> | <b>13.97</b> | <b>11.81</b>     | <b>19.92</b> | <b>34.54</b> |
| 2         | <b>14.65</b> | <b>21.75</b> | <b>15.78</b> | <b>15.78</b> | <b>15.8</b>  | <b>20.72</b> | <b>14.17</b> | <b>11.81</b> | <b>11.21</b>     | <b>19.13</b> | <b>31.8</b>  |
| 3         | <b>14.51</b> | <b>21.67</b> | <b>15.74</b> | <b>15.74</b> | <b>12.11</b> | <b>17.07</b> | <b>14.08</b> | <b>10.82</b> | <b>10.84</b>     | <b>18.64</b> | <b>27.29</b> |
| 4         | <b>14.36</b> | <b>21.38</b> | <b>15.17</b> | <b>15.17</b> |              | <b>16.44</b> | <b>12.01</b> | <b>10.43</b> | <b>10.77</b>     | <b>18.62</b> | <b>21.34</b> |
| 5         | <b>13.83</b> | <b>20.9</b>  | <b>14.82</b> | <b>14.82</b> |              | <b>10.61</b> | <b>10.83</b> | <b>10.28</b> | 9.65             | <b>18.14</b> | <b>11.86</b> |
| 6         | <b>13.52</b> | <b>20.75</b> | <b>14.78</b> | <b>14.78</b> |              |              | <b>10.51</b> | <b>10.24</b> | 9.64             | <b>15.5</b>  | <b>10.53</b> |
| 7         | <b>13.51</b> | <b>20.59</b> | <b>14.75</b> | <b>14.75</b> |              |              | <b>10.22</b> | 9.6          | 9.59             | <b>14.64</b> | <b>10.07</b> |
| 8         | <b>13.41</b> | <b>19.12</b> | <b>14.58</b> | <b>14.58</b> |              |              | 9.81         | 9.55         | 9.42             | <b>13.52</b> |              |
| 9         | <b>13.34</b> | <b>18.99</b> | <b>14.57</b> | <b>14.57</b> |              |              | 9.46         | 9.46         | 9.4              | 7.01         |              |
| 10        | <b>13.33</b> | <b>18.91</b> | <b>14.2</b>  | <b>14.2</b>  |              |              | 9.3          | 9.2          | 9.27             | 5.5          |              |
| 11        | <b>12.82</b> | <b>18.86</b> | <b>14.07</b> | <b>14.07</b> |              |              | 8.42         | 9.07         | 8.93             |              |              |
| 12        | <b>12.2</b>  | <b>18.82</b> | <b>14.03</b> | <b>14.03</b> |              |              | 8.25         | 8.71         | 8.91             |              |              |
| 13        | <b>12.09</b> | <b>18.7</b>  | <b>14.01</b> | <b>14.01</b> |              |              | 8.1          | 8.63         | 8.88             |              |              |
| 14        | <b>11.81</b> | <b>18.52</b> | <b>13.89</b> | <b>13.89</b> |              |              | 7.88         | 8.41         | 8.71             |              |              |
| 15        | <b>11.53</b> | <b>18.23</b> | <b>13.66</b> | <b>13.66</b> |              |              | 7.82         | 8.33         | 8.31             |              |              |
| 16        | <b>10.97</b> | <b>18.23</b> | <b>13.1</b>  | <b>13.1</b>  |              |              | 7.12         | 8.3          | 7.46             |              |              |
| 17        | <b>10.93</b> | <b>18.02</b> | <b>13.07</b> | <b>13.07</b> |              |              | 7.1          | 8.3          | 6.19             |              |              |
| 18        | <b>10.64</b> | <b>16.96</b> | <b>12.81</b> | <b>12.81</b> |              |              | 6.99         | 8.3          | 5.78             |              |              |
| 19        | <b>10.53</b> | <b>16.7</b>  | <b>12.71</b> | <b>12.71</b> |              |              | 6.4          | 8.3          |                  |              |              |
| 20        | 9.73         | <b>16.57</b> | <b>12.43</b> | <b>12.43</b> |              |              | 6.02         | 8.27         |                  |              |              |
| 21        | 8.68         | <b>16.42</b> | <b>12.32</b> | <b>12.32</b> |              |              | 5.91         | 8.08         |                  |              |              |
| 22        | 7.77         | <b>15.96</b> | <b>12.18</b> | <b>12.18</b> |              |              | 5.73         | 7.95         |                  |              |              |
| 23        | 7.14         | <b>15.92</b> | <b>12.1</b>  | <b>12.1</b>  |              |              | 5.56         | 7.94         |                  |              |              |
| 24        | 6.67         | <b>15.87</b> | <b>11.62</b> | <b>11.62</b> |              |              | 5.47         | 7.8          |                  |              |              |
| 25        |              | <b>15.35</b> | <b>11.62</b> | <b>11.62</b> |              |              | 5.36         | 7.77         |                  |              |              |
| 26        |              | <b>15.3</b>  | <b>11.09</b> | <b>11.09</b> |              |              | 5.35         | 7.77         |                  |              |              |
| 27        |              | <b>15.27</b> | <b>10.98</b> | <b>10.98</b> |              |              | 5.33         | 7.51         |                  |              |              |
| 28        |              | <b>14.87</b> | <b>10.8</b>  | <b>10.8</b>  |              |              | 5.2          | 7.12         |                  |              |              |
| 29        |              | <b>14.44</b> | <b>10.78</b> | <b>10.78</b> |              |              | 5.15         | 6.77         |                  |              |              |
| 30        |              | <b>13.3</b>  | <b>10.58</b> | <b>10.58</b> |              |              | 5.11         | 6.6          |                  |              |              |
| 31        |              |              | <b>10.53</b> | <b>10.53</b> |              |              | 5.03         | 6.49         |                  |              |              |
| 32        |              |              | <b>10.24</b> | <b>10.24</b> |              |              | 5.03         | 5.74         |                  |              |              |
| 33        |              |              | 9.93         | 9.93         |              |              | 5.03         | 5.24         |                  |              |              |
| 34        |              |              | 9.22         | 9.22         |              |              | 4.98         | 5.19         |                  |              |              |
| 35        |              |              | 8.95         | 8.95         |              |              | 4.95         | 5.16         |                  |              |              |
| 36        |              |              | 8.57         | 8.57         |              |              | 4.92         | 5            |                  |              |              |
| 37        |              |              | 8.54         | 8.54         |              |              | 4.85         | 4.99         |                  |              |              |
| 38        |              |              | 8.39         | 8.39         |              |              | 4.81         | 4.95         |                  |              |              |
| 39        |              |              | 7.78         | 7.78         |              |              | 4.79         | 4.92         |                  |              |              |
| 40        |              |              | 7.4          | 7.4          |              |              | 4.78         | 4.79         |                  |              |              |
| 41        |              |              |              |              |              |              | 4.77         | 4.73         |                  |              |              |
| 42        |              |              |              |              |              |              | 4.72         | 4.66         |                  |              |              |
| 43        |              |              |              |              |              |              | 4.65         | 4.6          |                  |              |              |
| 44        |              |              |              |              |              |              | 4.64         | 4.56         |                  |              |              |
| 45        |              |              |              |              |              |              | 4.62         |              |                  |              |              |

**Supplementary Table 10:** Sulfur peak heights ( $\sigma$ ) detected by ANODE from phased anomalous difference Fourier maps. Peaks above 10  $\sigma$  are shown in bold.

| Scatterer | Fap1         |              | AlgE         |             | NaK2K        | Streptactin  | SERCA        |              |      |      | TauA         | GP1          | RNA G        | IRF4         |              | BphA4        |
|-----------|--------------|--------------|--------------|-------------|--------------|--------------|--------------|--------------|------|------|--------------|--------------|--------------|--------------|--------------|--------------|
|           | Ca           | S            | Ca           | S           | K            | Cl           | V            | K            | Cl   | S*   | I            | Cd           | K            | P            | S            | P            |
| 1         | <b>64.16</b> |              |              | <b>34.5</b> | <b>40.95</b> | <b>21.69</b> | <b>42.98</b> |              |      |      | <b>75.39</b> | <b>22.82</b> | <b>13.89</b> |              | <b>18.4</b>  | <b>39.71</b> |
| 2         | <b>45.45</b> |              |              | <b>31.8</b> | <b>39.19</b> | <b>18.22</b> | <b>37.58</b> |              |      |      | <b>52.58</b> | <b>19.76</b> | <b>10.62</b> | <b>13.49</b> |              |              |
| 3         |              | <b>11.08</b> |              | <b>27.3</b> | <b>38.6</b>  | <b>17.03</b> |              | <b>11.65</b> |      |      | <b>34.87</b> | <b>18.21</b> | <b>10.45</b> |              | <b>13.03</b> |              |
| 4         |              |              |              | <b>21.3</b> | <b>37.95</b> | <b>11.53</b> |              |              | 8.74 |      | <b>32.51</b> | <b>15.97</b> |              | <b>12.74</b> |              |              |
| 5         |              |              | <b>11.86</b> |             | <b>36.42</b> | 8.79         |              | 8.69         |      |      | <b>29.38</b> | <b>12.93</b> |              | <b>12.68</b> |              |              |
| 6         |              |              | <b>10.53</b> |             | <b>36.27</b> | 8.75         |              |              |      | 8.15 | <b>16.44</b> |              |              | <b>12.63</b> |              |              |
| 7         |              |              |              | <b>10.1</b> | <b>31.23</b> | 8.02         |              |              |      | 7.81 | <b>14.05</b> |              |              | <b>12.23</b> |              |              |
| 8         |              |              |              |             | <b>27.83</b> |              |              |              |      | 7.56 | <b>13.05</b> |              |              | <b>12.01</b> |              |              |
| 9         |              |              |              |             | <b>10.33</b> |              |              |              |      | 7.44 |              |              |              | <b>11.06</b> |              |              |
| 10        |              |              |              |             | 6.75         |              |              |              |      | 7.38 |              |              |              | 9.97         |              |              |
| 11        |              |              |              |             |              |              |              |              |      | 7.36 |              |              |              | 9.45         |              |              |
| 12        |              |              |              |             |              |              |              |              |      | 7.18 |              |              |              | 9.4          |              |              |
| 13        |              |              |              |             |              |              |              |              |      | 7.14 |              |              |              | 8.16         |              |              |
| 14        |              |              |              |             |              |              |              |              |      | 7.09 |              |              |              | 7.98         |              |              |
| 15        |              |              |              |             |              |              |              |              |      | 6.77 |              |              |              | 7.92         |              |              |
| 16        |              |              |              |             |              |              |              |              |      | 6.69 |              |              |              | 7.87         |              |              |
| 17        |              |              |              |             |              |              |              |              |      | 6.68 |              |              |              | 7.46         |              |              |
| 18        |              |              |              |             |              |              |              |              |      | 6.53 |              |              |              | 7.34         |              |              |
| 19        |              |              |              |             |              |              |              |              |      | 6.46 |              |              |              | 7.32         |              |              |
| 20        |              |              |              |             |              |              |              |              |      | 6.44 |              |              |              | 7.32         |              |              |
| 21        |              |              |              |             |              |              |              |              |      | 6.39 |              |              |              | 7.28         |              |              |
| 22        |              |              |              |             |              |              |              |              |      | 6.37 |              |              |              | 6.77         |              |              |
| 23        |              |              |              |             |              |              |              |              |      | 6.37 |              |              |              | 6.7          |              |              |
| 24        |              |              |              |             |              |              |              |              |      | 6.34 |              |              |              | 5.99         |              |              |
| 25        |              |              |              |             |              |              |              |              | 6.32 |      |              |              |              | 5.96         |              |              |
| 26        |              |              |              |             |              |              |              |              |      | 6.26 |              |              |              | 5.91         |              |              |
| 27        |              |              |              |             |              |              |              |              |      | 6.26 |              |              |              | 5.58         |              |              |
| 28        |              |              |              |             |              |              |              |              |      | 6.22 |              |              |              | 5.39         |              |              |
| 29        |              |              |              |             |              |              |              |              |      | 6.21 |              |              |              | 5.39         |              |              |
| 30        |              |              |              |             |              |              |              |              |      | 6.07 |              |              |              | 5.37         |              |              |
| 31        |              |              |              |             |              |              |              |              |      | 6.05 |              |              |              | 5.33         |              |              |
| 32        |              |              |              |             |              |              |              |              |      | 6.02 |              |              |              | 5            |              |              |
| 33        |              |              |              |             |              |              |              |              |      | 6.01 |              |              |              | 4.96         |              |              |
| 34        |              |              |              |             |              |              |              |              |      | 6    |              |              |              | 4.85         |              |              |
| 35        |              |              |              |             |              |              |              |              |      | 5.99 |              |              |              |              | 4.73         |              |
| 36        |              |              |              |             |              |              |              |              |      | 5.95 |              |              |              | 4.5          |              |              |
| 37        |              |              |              |             |              |              |              |              |      | 5.95 |              |              |              | 4.39         |              |              |
| 38        |              |              |              |             |              |              |              |              |      | 5.83 |              |              |              | 4.38         |              |              |
| 39        |              |              |              |             |              |              |              |              |      | 5.79 |              |              |              | 4.38         |              |              |

**Supplementary Table 11:** Peak heights ( $\sigma$ ) detected by ANODE from phased anomalous difference Fourier maps. Peaks above 10  $\sigma$  are shown in bold. \* Only 39 of 80 peaks are shown for S.

```

import binascii
import sys
import os
from multiprocessing import Pool, cpu_count
from cbflib_adaptbx import uncompress, compress
from scitbx.random import variate, poisson_distribution

start_tag = binascii.unhexlify("0c1a04d5")
rate = float(os.environ.get("RATE", "0.0"))

if rate <= 0:
    sys.exit(f"Impossible rate constant: {rate}")

def add_noise(filename_in):
    filename_out = f"noisy_{filename_in}"

    print(f"{filename_in} -> {filename_out}")

    data = open(filename_in, "rb").read()

    generator = variate(poisson_distribution(mean=rate))
    data_offset = data.find(start_tag) + 4
    cbf_header = data[: data_offset - 4]

    fast = 0
    slow = 0
    length = 0

    for record in cbf_header.decode().split("\n"):
        if "X-Binary-Size-Fastest-Dimension" in record:
            fast = int(record.split()[-1])
        elif "X-Binary-Size-Second-Dimension" in record:
            slow = int(record.split()[-1])
        elif "X-Binary-Number-of-Elements" in record:
            length = int(record.split()[-1])
        elif "X-Binary-Size:" in record:
            size = int(record.split()[-1])

    assert length == fast * slow

    pixel_values = uncompress(
        packed=data[data_offset : data_offset + size], fast=fast, slow=slow
    )

    tailer = data[data_offset + 4 + size :]

    for j in range(len(pixel_values)):
        if pixel_values[j] < 0:
            continue
        pixel_values[j] += next(generator)

    compressed = compress(pixel_values)

    fixed_header = ""

    for record in cbf_header.decode().split("\n"):
        if "Content-MD5" in record:
            pass
        elif "X-Binary-Size:" in record:
            fixed_header += f"X-Binary-Size: {len(compressed)}\r\n"
        else:
            fixed_header += f"{record}\n"

    with open(filename_out, "wb") as f:
        f.write(fixed_header.encode())
        f.write(start_tag)
        f.write(compressed)
        f.write(tailer)

if __name__ == "__main__":
    p = Pool(cpu_count())
    p.map(add_noise, sys.argv[1:])

```

**Supplementary Note 1: Python script for adding detector background noise.** The script adds a random value drawn from a Poisson distribution to every detector pixel.
